# Supplementary material
Source: PubMed Central journal article supplement (PMC2701458)
Supplement: mol.109.055913_1.pdf [file mol.109.055913_1.pdf]

## Supplementary 1

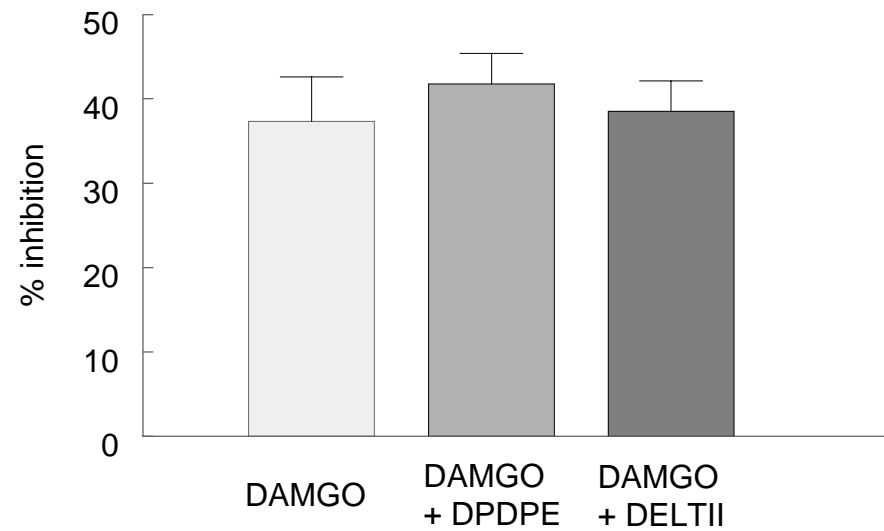

Inhibition of Ca<sup>2+</sup> current amplitude by DAMGO (1  $\mu$ M) applied alone or in combination with DPDPE (1  $\mu$ M) or deltorphin II (DELTII, 1  $\mu$ M). The data are averages of recordings from six  $\delta$ +/ $\delta$  DRG neurons that received all three treatments. The order of drug application was randomized to avoid a systematic impact of desensitization due to multiple applications of DAMGO. Vertical bars represent  $\pm$  SEM.
