# Supplementary material
Source: PubMed Central journal article supplement (PMC2701458)
Supplement: mol.109.055913_2.pdf [file mol.109.055913_2.pdf]

## Supplementary 2

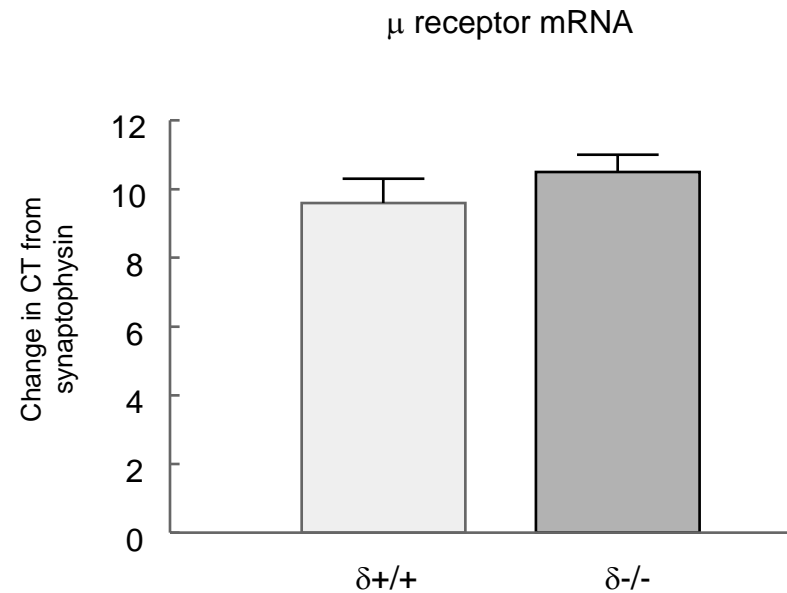

Quantitative PCR revealed no difference in the levels of mRNA transcripts for the mu receptor in cultured DRG neurons from  $\delta^{+/+}$  and  $\delta^{-/-}$  mice. mRNA was harvested from DRG cultures, characterized previously (Walwyn et al., 2004; 2005) after 2 days *in vitro*. mRNA was reverse transcribed, identified and quantified using gene specific primer-probe sets (Walwyn et al., 2007). The data were normalized to the expression of the control gene, synaptophysin (Chen et al 2001) and are presented as the mean  $\pm$  s.e.m. of three experiments.
