# Supplementary material
Source: PubMed Central journal article supplement (PMC2701458)
Supplement: mol.109.055913_3.pdf [file mol.109.055913_3.pdf]

## Supplementary 3

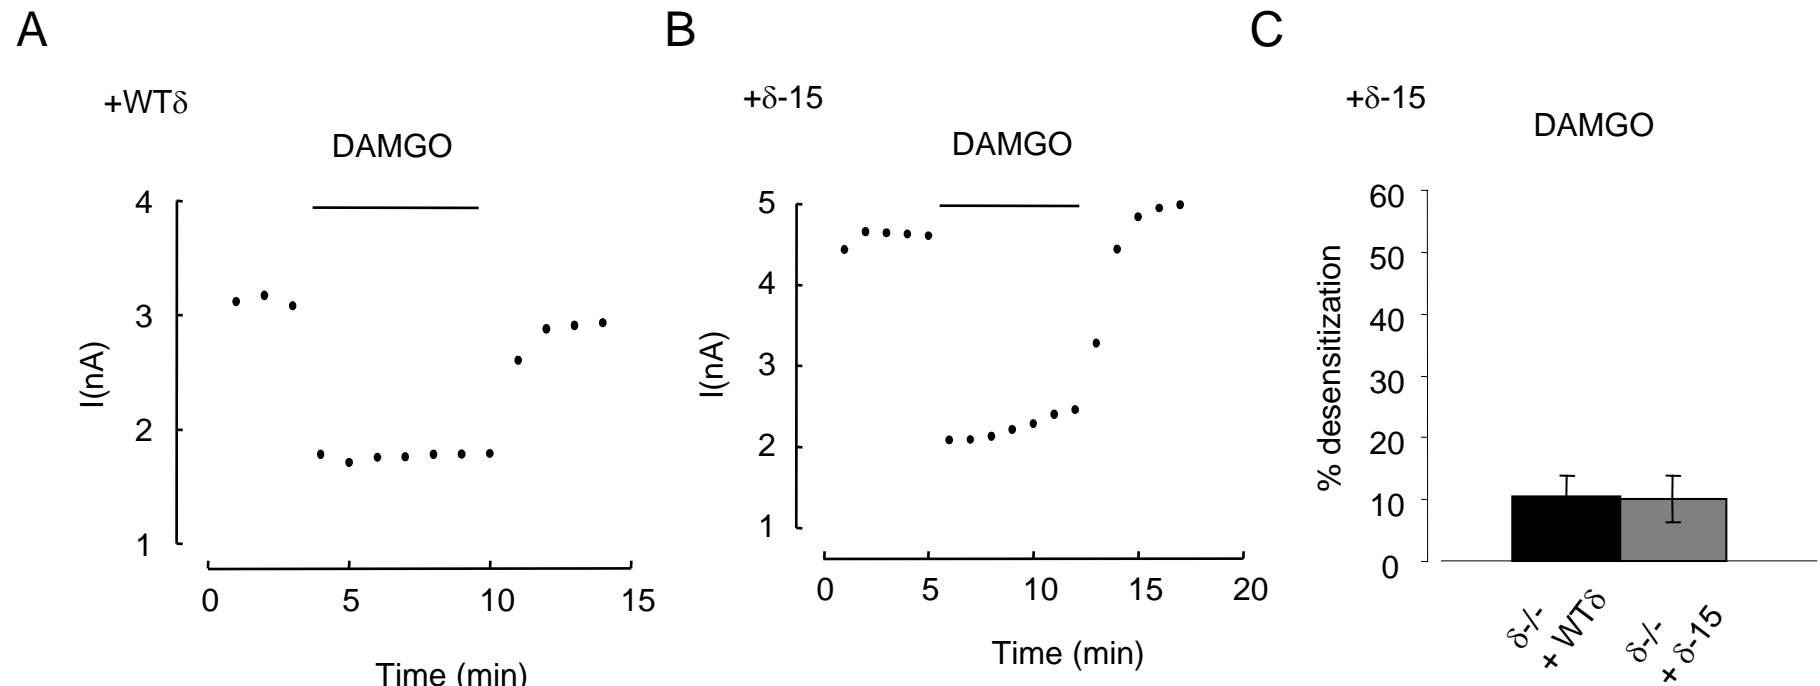

The dot plots illustrate the time course of the inhibition of  $\text{Ca}^{2+}$  currents by DAMGO (1  $\mu\text{M}$ ) in  $\delta$ -/- DRG neurons expressing A, the full length recombinant  $\delta$  receptor (+WT $\delta$ ) and B, the truncated  $\delta$ -15 construct (+ $\delta$ -15). C, The bar graph depicts the mean percent desensitization during 5 min exposure to DAMGO of  $\delta$ -/- neurons expressing the full length  $\delta$  receptor and the  $\delta$ -15 construct. The loss of DAMGO-evoked inhibition after 5 min of exposure was expressed as a percentage of the peak inhibition in each cell. There is little desensitization of the DAMGO response in the presence of the  $\delta$  receptor and this is not influenced by expression of the  $\delta$ -15 construct. By contrast DPDPE induced desensitization was strongly influenced by the  $\delta$ -15 construct (Fig. 6D).
